# Supplementary material for: Regulation of mRNA splicing by MeCP2 via epigenetic modifications in the brain
Source: PubMed Central journal article supplement (PMC5314398; doi:10.1038/srep42790), 2017-02-17
Supplement: srep42790-s1.pdf [file srep42790-s1.pdf]

## **Regulation of mRNA splicing by MeCP2 via epigenetic modifications in the brain**

Tian-Lin Cheng<sup>1,\*</sup>, Jingqi Chen<sup>2</sup>, Huida Wan<sup>3</sup>, Bin Tang<sup>3</sup>, Weidong Tian<sup>2</sup>, Lujian Liao<sup>3,\*</sup>, Zilong Qiu<sup>1,\*</sup>

<sup>1</sup>Institute of Neuroscience, Key Laboratory of Primate Neurobiology, State Key Laboratory of Neuroscience, CAS Center for Excellence in Brain Science and Intelligence Technology, Shanghai Institutes for Biological Sciences, Chinese Academy of Sciences, 320 Yue-Yang Road, Shanghai, China, 200031

<sup>2</sup>Department of Biostatistics and Computational Biology, School of Life Science, Fudan University, Shanghai, China, 200436

<sup>3</sup>Shanghai Key Laboratory of Regulatory Biology, School of Life Sciences, East China Normal University, 500 Dongchuan Road, Shanghai, China 200241

\*Co-corresponding authors: Tian-Lin Cheng ([tlcheng@ion.ac.cn](mailto:tlcheng@ion.ac.cn)) , Lujian Liao ([ljliao@bio.ecnu.edu.cn](mailto:ljliao@bio.ecnu.edu.cn)), Zilong Qiu ([zqiu@ion.ac.cn](mailto:zqiu@ion.ac.cn))

### **Supplementary Figure 1.**

**a-b.** MeCP2 expression in cultured mouse cortical neurons infected with lentivirus expressing shRNA targeting either mouse *Mecp2* or scrambled sequence at mRNA (a) and protein level (b).

c. Genes containing exons identified by both ASD and DEXseq software in mouse cortical neurons.

### **Supplementary Figure 2. Genomic location of MeCP2, Pol II, H3K4me3**

- A. Average diagram of MeCP2 ChIP-Seq data<sup>2</sup> in exons which were upregulated, downregulated or unchanged in MeCP2-knockdown neurons.
- B. Average diagram of Pol II ChIP-Seq data<sup>2</sup> in exons which were upregulated, downregulated or unchanged in MeCP2-knockdown neurons.
- C. Average diagram of H3K4me3 ChIP-Seq data<sup>2</sup> in exons which were upregulated, downregulated or unchanged in MeCP2-knockdown neurons.
- D. Average diagram of H3K4me3 ChIP-Seq data<sup>3</sup> in exons which were upregulated, downregulated or unchanged in MeCP2-knockdown neurons.

### **Supplementary Figure 3**

- a. Histogram and radar chart for GO analysis of the genes containing MeCP2-regulated exons identified in rat cortex.
- b. Functional annotations of MeCP2-binding proteins identified in 293T cells by Ni-NTA purification strategy.

**Supplementary Table 1 RNA splicing changes in *Mecp2*-null rat hippocampus as compared to wild-type rat analyzed by DEXseq software.**

**Supplementary Table 2 RNA splicing changes in *Mecp2*-knockdown mouse cultured cortex neurons as compared to wild-type neurons analyzed by ASD software.**

**Supplementary Table 3 RNA splicing changes in *Mecp2*-null rat hippocampus as compared to wild-type rat analyzed by ASD software.**

**Supplementary Table 4 Overlap between genes containing MeCP2-regulated exons and different gene lists**

The numbers in *Gene number* line means protein number in database (number of genes encoding related proteins identified in RNA-seq data)

A

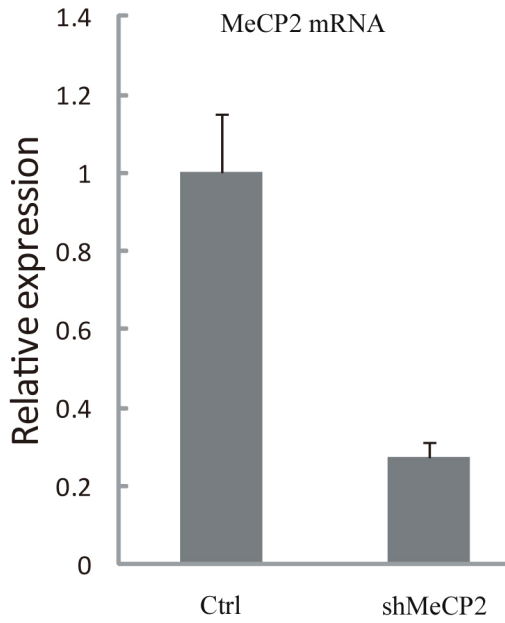

B

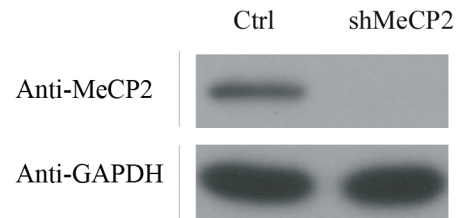

C

| Genes containing exons identified by both ASD and DEXseq software |               |
|-------------------------------------------------------------------|---------------|
| Celf6                                                             | Amn1          |
| St3gal3                                                           | Cnnm3         |
| Mff                                                               | Enah          |
| Rean1                                                             | Fam49b        |
| Nek2                                                              | Gapvd1        |
| Delk1                                                             | Mcf21         |
| Fyn                                                               | Mfsd6         |
| Gabrg2                                                            | Osbpl9        |
| Spna2                                                             | Ppig          |
| Wdfy3                                                             | Ptk2          |
| Runx1t1                                                           | Rebtb2        |
| Pfkfb3                                                            | Sirt2         |
| Eps15                                                             | St6galnac6    |
| Camta1                                                            | Tll5          |
| Pdzrn3                                                            | 1810012P15Rik |
| Rims1                                                             |               |
| Syt7                                                              |               |

**A****MeCP2 data2**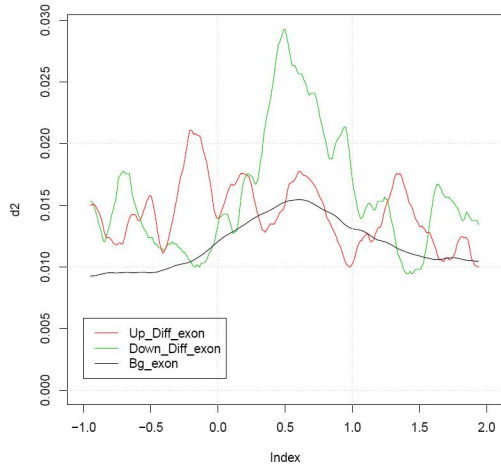**B****PoII data2**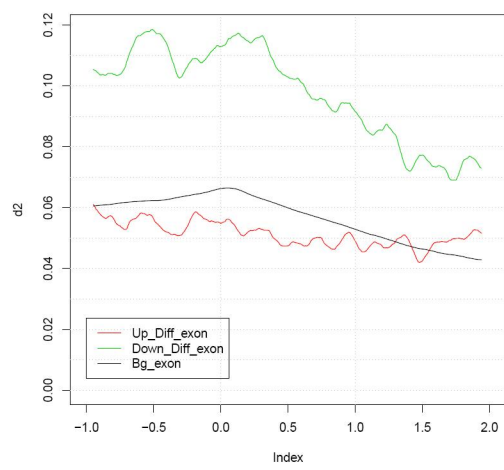**C****H3K4me3 data2**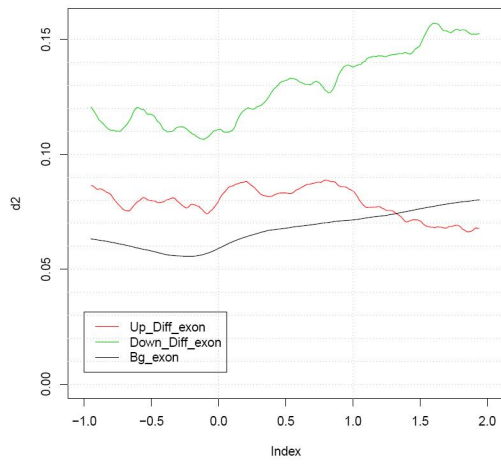**D****H3K4me3 data3**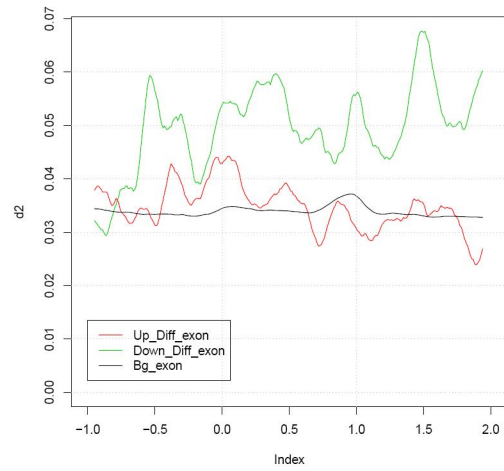

A

**Rat GO enrichment:Biological processes**

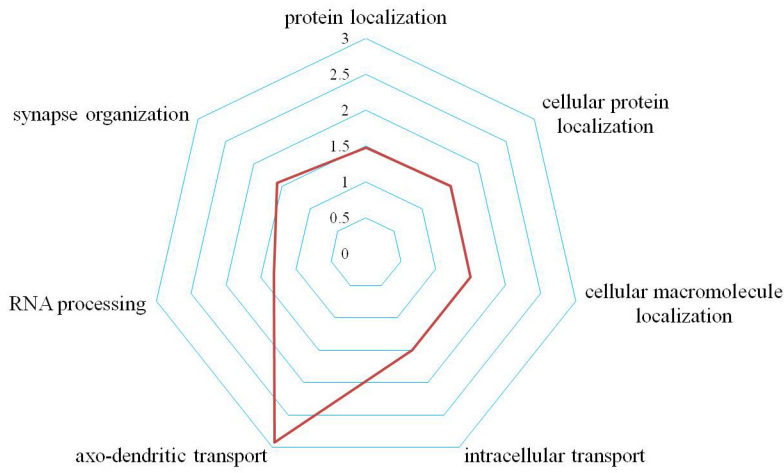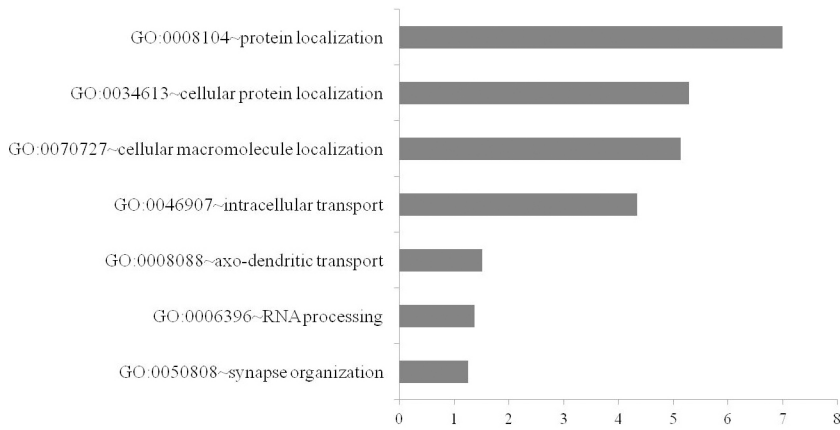

B

**Chromatin-related**

Histone H2A  
BRD4 (acetylated Histone)  
CHD7 (methylated H3)  
CHD1 (H3K4me2 and H3K4me3)  
CHD2 (H3, 3)  
PARP1 (H3K4me3)  
WAC (H2B ubiquitination)  
ATRX (SWI/SNF complex)  
ARID1B (SWI/SNF complex)  
TOP1

**Transcriptional factor**

GTF2A1  
GATA6  
POU3F3  
POU4F1  
YY1  
NFX1  
ZFP37  
SOX21  
ZNF652  
CDX2  
CREB5  
TBX1  
SIN3A  
FBRSL1 (PRC1 complex)  
CBX4 (PRC1 complex)  
AUTS2 (PRC1 complex)  
PHF6  
ATN1  
EPN1

**Splicing factor**

HNRNPA3 hnRNP particles  
HNRNPL hnRNP particles  
HNRNPA2B1 hnRNP particles  
HNRNPA1 hnRNP particles  
SF3A2 U2 snRNP complex  
SF3B4 U2 snRNP complex  
DDX42 U2 snRNP complex  
DHX15 U11/U12 snRNPs  
SFPQ U5, 4/6 snRNP complexes  
NONO U5, 4/6 snRNP complexes  
PTBP1 Interacts with RAVER1 and SFPQ  
TIA1 alternative pre-mRNA splicing  
Binds U2AF2. Interacts with U1 snRNA. Binds EWSR1, FUS and TAF15  
SF1  
CPSF7 pre-mRNA 3'-processing  
WDR33 pre-mRNA 3'-processing  
PABPC1 PolyA-related  
ATXN2 Interacts with PABPC1  
ATXN2L  
SFSWAP  
SAFB2  
REM33  
REM27  
REM15B

**Supplementary Table 4. Overlap between genes containing MeCP2-regulated exons and different gene lists**

| Gene list             | Gene number | overlap | <i>Odd ratio</i> | <i>P-value</i> |
|-----------------------|-------------|---------|------------------|----------------|
| Postsynaptic proteome | 1080 (974)  | 163     | 2.87             | 0              |
| NMDAR complex         | 186(172)    | 36      | 3.31             | 1.13e-8        |
| mGluR5 complex        | 52(49)      | 16      | 5.11             | 1.195e-6       |
| AMPA complex          | 9(6)        | 1       | 2.58             | 0.355          |
| synaptome             | 152(144)    | 35      | 3.85             | 6.40e-10       |
| Presynaptic proteome  | 393(304)    | 54      | 2.84             | 5.32e-10       |
| SFARI AUTISM          | 616(513)    | 64      | 1.99             | 2.21e-6        |
